# Supplementary material for: Comparison of Outcomes of Active Surveillance in Intermediate-Risk Versus Low-Risk Localised Prostate Cancer Patients: A Systematic Review and Meta-Analysis
Source: MDPI journal article supplement (doi:10.3390/jcm12072732), 2023-04-06
Supplement: s1 [file s1]

Table S1. Summary of methodology of the included studies.

| Study name                  | Study period | Study design  | Risk stratification                                                                                                                                                                                                                                                                                                                                                                                                                                                                                                                                                                                                                 | MRI scan                                                                                                                                                                                  | Follow up confirmatory biopsy                                                                                         | Trigger for intervention                                                                                                                                                                                                                                                                                                                                                                                                       |
|-----------------------------|--------------|---------------|-------------------------------------------------------------------------------------------------------------------------------------------------------------------------------------------------------------------------------------------------------------------------------------------------------------------------------------------------------------------------------------------------------------------------------------------------------------------------------------------------------------------------------------------------------------------------------------------------------------------------------------|-------------------------------------------------------------------------------------------------------------------------------------------------------------------------------------------|-----------------------------------------------------------------------------------------------------------------------|--------------------------------------------------------------------------------------------------------------------------------------------------------------------------------------------------------------------------------------------------------------------------------------------------------------------------------------------------------------------------------------------------------------------------------|
| Ventimiglia (2022 Sep) [24] | 1992-2014    | Retrospective | <p>VLRPC: T1c, positive cores <math>\leq</math> 33%, cancer length <math>\leq</math> 8mm, GS 6, PSA <math>&lt;</math> 10, prostate volume <math>&lt;</math> 90cc, <math>&gt;</math> 5 core biopsies performed, PSAD <math>&lt;</math> 0.15.</p> <p>LRPC: GS 6; PSA <math>&lt;</math> 10; T1/T2 with at least one of the following: prostate volume <math>\geq</math> 90cc, PSAD <math>\geq</math> 0.15, <math>\leq</math> 5 core biopsies performed, positive cores <math>&gt;</math> 33%, cancer length <math>&gt;</math> 8 mm; or GGG 1, T1 or T2 with PSA 10-14.</p> <p>IRPC: GS 7 (3+4), PSA <math>&lt;</math> 10, T1 or T2</p> | NA                                                                                                                                                                                        | NA                                                                                                                    | NA                                                                                                                                                                                                                                                                                                                                                                                                                             |
| Cyll (2022 Apr) [25]        | 2009-2016    | Prospective   | <p>LRPC: CAPRA score 0-2 and PSA <math>&lt;</math> 10 and GGG 1.</p> <p>IRPC: CAPRA score 3-5 and/or PSA 10-20 and/or GGG 2</p>                                                                                                                                                                                                                                                                                                                                                                                                                                                                                                     | <p>Most patients had MRI before or within one year of diagnosis.</p> <p>LRPC: MRI after 12, 48 and 60 months.</p> <p>IRPC: MRI after 12, 24 and 48, and every second year after that.</p> | <p>LRPC: At 1 year and every 60 months thereafter.</p> <p>IRPC: At 1 and 2 years, and every 60 months thereafter.</p> | <p>Histological reclassification (GGG <math>\geq</math> 3, perineural invasion or increase in number of positive biopsies), radiological reclassification (EPE or SVI, increase in tumour diameter or the number of PI-RADS score <math>&gt;</math> 3 lesions), PSA re-classification (PSA <math>&gt;</math> 20 or PSADT <math>&lt;</math> 1 year). Clinical reclassification (cT <math>\geq</math> 3), patient preference</p> |
| Courtney (2022 Feb) [26]    | 2001-2015    | Retrospective | As per NCCN criteria                                                                                                                                                                                                                                                                                                                                                                                                                                                                                                                                                                                                                | NA                                                                                                                                                                                        | At least once                                                                                                         | NA                                                                                                                                                                                                                                                                                                                                                                                                                             |

|                                 |           |               |                                                                                                                                                                                                                                                                                       |                                                                                                          |                                     |                                                                              |
|---------------------------------|-----------|---------------|---------------------------------------------------------------------------------------------------------------------------------------------------------------------------------------------------------------------------------------------------------------------------------------|----------------------------------------------------------------------------------------------------------|-------------------------------------|------------------------------------------------------------------------------|
| Sayyid<br>(2022 Jan)<br>[27]    | 2010-2015 | Retrospective | As per NCCN criteria                                                                                                                                                                                                                                                                  | NA                                                                                                       | NA                                  | NA                                                                           |
| Cooley<br>(2021 Nov)<br>[28]    | 1991-2018 | Prospective   | As per NCCN criteria                                                                                                                                                                                                                                                                  | NA                                                                                                       | NA                                  | Grade re-classification, PSA progression, tumour volume progression, anxiety |
| Herden<br>(2021 Jul)<br>[29]    | 2008-2013 | Prospective   | As per NCCN criteria                                                                                                                                                                                                                                                                  | NA                                                                                                       | After 1 year, then every 3 years    | Histologic upgrade, PSADT <3 years, clinical T stage upgrade, patient desire |
| Rakauskas<br>(2021 Jul)<br>[30] | 2013-2018 | Prospective   | LRPC (strict criteria): PSA <10, GS 6, number of positive biopsies ≤3, maximum cancer burden ≤3 mm and <50% invasion, mpMRI PI-RADS score 1-3.<br><br>FLRPC (expanded criteria): PSA <15, GS ≤3+4, number of positive biopsies ≤5, maximum cancer burden ≤8, mpMRI PI-RADS score 4-5. | At enrolment and subsequently once a year for the first two years, every 2 years thereafter              | Once a year for the first two years | Progression beyond the set criteria, patient desire                          |
| Mukherjee<br>(2021 Jan)<br>[31] | 2002-2019 | Prospective   | As per D'Amico criteria                                                                                                                                                                                                                                                               | At enrolment and subsequently every 2 years (since 2014). Also, if rising PSA or change in DRE findings. | At 1 year                           | Clinical, histological or radiological progression and patient desire        |

|                                |           |               |                          |                                                                                                 |                                       |                                                                                                                                    |
|--------------------------------|-----------|---------------|--------------------------|-------------------------------------------------------------------------------------------------|---------------------------------------|------------------------------------------------------------------------------------------------------------------------------------|
| Carlsson<br>(2020 Jun)<br>[32] | 2000-2017 | Retrospective | IRPC: GG 2               | At enrolment and<br>every 18 months<br>(contemporary<br>strategy)                               | Every 2-3 years                       | Evidence of disease<br>progression and patient<br>desire                                                                           |
| Richard<br>(2020 Jun)<br>[33]  | 2002-2011 | Retrospective | IRPC: GG 2 and 3         | No                                                                                              | NA                                    | Evidence of disease<br>progression and patient<br>desire                                                                           |
| Butler<br>(2019 Sep)<br>[34]   | 2010-2015 | Retrospective | As per NCCN criteria     | NA                                                                                              | NA                                    | NA                                                                                                                                 |
| Shelton<br>(2019 Aug)<br>[35]  | 2013-2017 | Retrospective | As per NCCN criteria     | NA                                                                                              | NA                                    | Increase in GS or disease<br>volume ( $\geq 3$ cores), rising<br>PSA, concerning findings on<br>genetic testing, patient<br>desire |
| Thomsen<br>(2019 Mar)<br>[36]  | 2002-2012 | Retrospective | As per NCCN criteria     | NA                                                                                              | At 2 years for IRPC                   | NA                                                                                                                                 |
| Masic<br>(2018 Oct)<br>[37]    | 1990-2016 | Retrospective | LRPC: GG 1<br>IRPC: GG 2 | Used in selected<br>patients later in<br>the study, but not<br>a formal part of<br>the protocol | At 1 year, then every<br>1-2 years    | Mainly histological upgrade                                                                                                        |
| Whalen<br>(2018 Apr)<br>[38]   | 1990-2012 | Retrospective | As per NCCN criteria     | NA                                                                                              | NA                                    | NA                                                                                                                                 |
| Thostrup<br>(2018 Feb)<br>[15] | 2002-2017 | Prospective   | As per NCCN criteria     | NA                                                                                              | At 1 year                             | Clinical, pathological or PSA<br>progression                                                                                       |
| Savdie<br>(2017 Oct)<br>[39]   | 1993-2014 | Retrospective | As per NCCN criteria     | Incorporated<br>since 2010                                                                      | At 18 months, then<br>every 1-2 years | Persistent PSA rise;<br>pathological, clinical or MRI<br>progression; patient desire                                               |

|                                  |           |               |                                                                                                                   |    |                                                  |                                                                                       |
|----------------------------------|-----------|---------------|-------------------------------------------------------------------------------------------------------------------|----|--------------------------------------------------|---------------------------------------------------------------------------------------|
| Nyame<br>(2017 Sep)<br>[40]      | 2002-2015 | Retrospective | As per NCCN criteria                                                                                              | NA | At 1 year, thereafter<br>every 1-3 years         | Disease reclassification<br>(increase in grade or<br>volume), patient desire          |
| Musunuru<br>(2016 Dec)<br>[41]   | 1995-2013 | Prospective   | LRPC: cT1-T2b, GS 6, PSA ≤10<br>IRPC: cT2c, GS ≤3+4, PSA ≤15, Age >70                                             | NA | At 6-12 months,<br>thereafter every 3-4<br>years | Histologic or clinical<br>progression (palpable<br>nodule), PSA rise                  |
| Godtman<br>(2016 Nov)<br>[14]    | 1995-2014 | Prospective   | As per NCCN criteria                                                                                              | NA | Every 2-3 years                                  | Disease progression (PSA,<br>histologic grade, and/or<br>stage) or patient initiative |
| Berg<br>(2016 May)<br>[42]       | 2002-2015 | Prospective   | As per NCCN criteria                                                                                              | NA | No                                               | Radiological or histologic<br>progression, patient<br>preference                      |
| Yamamoto<br>(2016 May)<br>[43]   | 1995-2013 | Prospective   | As per NCCN criteria                                                                                              | NA | At 1 year, then every<br>3-4 years               | PSA doubling time <3 years,<br>histologic upgrade, clinical<br>progression            |
| Loeb<br>(2015 Feb)<br>[44]       | 2003-2007 | Prospective   | As per NCCN criteria                                                                                              | NA | NA                                               | Histologic upgrade, short<br>PSA doubling time, patient<br>desire                     |
| Bul<br>(2012 Dec)<br>[11]        | 1993-2007 | Prospective   | LRPC: T1c/T2, PSA ≤ 10, PSAD <0.2, GS<br>≤6, maximum 2 positive cores.<br>IRPC: PSA 10-20, GS 7, 3 positive cores | NA | NA                                               | Disease progression or<br>patient desire                                              |
| Cooperberg<br>(2011 Jan)<br>[45] | 1995-2010 | Prospective   | LRPC: CAPRA 0-2<br>IRPC: CAPRA 3-5                                                                                | NA | Every 1-2 year                                   | NA                                                                                    |

NCCN – National Comprehensive Cancer Network, CAPRA - Cancer of the Prostate Risk Assessment

Table S2. Baseline characteristics of the different study populations.

| Study name                           | Risk group | Number of patients (percent) | Age (years)      | PSA              | GS          |           |          | cT stage   |             |         |           | PSA density      |
|--------------------------------------|------------|------------------------------|------------------|------------------|-------------|-----------|----------|------------|-------------|---------|-----------|------------------|
|                                      |            |                              |                  |                  | 3+3         | 3+4       | 4+3      | cT1        | cT2a        | cT2b    | cT2c      |                  |
| Ventimiglia (2022 Sep, n=16177) [24] | VLRPC      | 5522 (34)                    | 67 (62-71)       | 5.6 (4.1-7.8)    | 14 684 (91) | 1118 (7)  | 0        | 13715 (85) | 2370 (14.6) |         |           | NA               |
|                                      | LRPC       | 9501 (59)                    |                  |                  |             |           |          |            |             |         |           |                  |
|                                      | IRPC       | 1154 (7)                     |                  |                  |             |           |          |            |             |         |           |                  |
| Cyll (2022 Apr, n=358) [25]          | LRPC       | 177 (49)                     | 63 (58-68)       | NA               | 177 (100)   | 0         | 0        | 129 (73)   | 48 (27)     |         |           | 0.13 (0.09-0.19) |
|                                      | IRPC       | 181 (51)                     | 66 (61-70)       |                  | 54 (30)     | 127 (70)  | 0        | 126 (70)   | 55 (30)     |         |           | 0.18 (0.13-0.26) |
| Courtney (2022 Feb, n=9733) [26]     | LRPC       | 8726 (89)                    | 65.1 (61.4-68.9) | 5.35 (4.20-6.6)  | 8726 (100)  | 0         | 0        | 7544 (86)  | 1182 (14)   |         |           | NA               |
|                                      | FIRPC      | 773 (8)                      | 65.6 (61.6-69.8) | 8.03 (4.80-11.0) | 369 (48)    | 404 (52)  | 0        | 592 (77)   | 181 (23)    |         |           |                  |
|                                      | UIRPC      | 234 (3)                      | 66.3 (61.1-71.3) | 8.63 (5.05-11.7) | 9 (4)       | 82 (35)   | 143 (61) | 152 (65)   | 82 (35)     |         |           |                  |
| Sayyid (2022 Jan, n=20334) [27]      | FIRPC      | 20334 (100)                  | 64.0 (58.0-69.0) | 5.60 (4.40-7.70) | 11110 (55)  | 9924 (45) | 0        | 9603 (47)  | 2173 (11)   | 373 (2) | 8185 (40) | NA               |
| Cooley (2021 Nov, n=6775) [28]       | LRPC-LV    | 4604 (68)                    | 64.0 (58.0-68.2) | 5.0 (3.7-6.7)    | 6207 (92)   | 482 (7)   | 81 (1)   | 5387 (80)  | 870 (13)    |         |           | NA               |
|                                      | LRPC-HV    | 360 (5)                      |                  |                  |             |           |          |            |             |         |           |                  |
|                                      | IRPC       | 1288 (19)                    |                  |                  |             |           |          |            |             |         |           |                  |
| Herden (2021 Jul, n=329) [29]        | VLRPC      | 207 (63)                     | 69.0 (63.4-72.5) | 5.3 (3.9-7.2)    | 307 (93)    | 21 (6)    | 0        | 277 (84)   | 36 (11)     | 9 (3)   | 7 (2)     | NA               |
|                                      | LRPC       | 70 (21)                      | 68.2±7.5         |                  |             |           |          |            |             |         |           |                  |
|                                      | IRPC*      | 52 (16)                      | 69.3±6.8         |                  |             |           |          |            |             |         |           |                  |
| Rakauskas (2021 Jul, n=51) [30]      | LRPC       | 17 (33)                      | 64 (60-69)       | 5.2 (3.4-6)      | 17 (100)    | 0         | 0        | 16 (94)    | 1 (7)       |         |           | 0.11 (0.1-0.2)   |
|                                      | FIRPC      | 34 (67)                      | 66 (62-69)       | 5.6 (4.5-8.1)    | 26 (76)     | 8 (24)    | 0        | 30 (88)    | 4 (12)      |         |           | 0.18 (0.1-0.3)   |

|                                          |       |            |                      |                |               |              |         |          |             |         |            |                      |
|------------------------------------------|-------|------------|----------------------|----------------|---------------|--------------|---------|----------|-------------|---------|------------|----------------------|
| Mukherjee<br>(2021 Jan,<br>n=372) [31]   | LRPC  | 276 (74)   | 63.6±6.6             | 5.7 (4.2–7.0)  | 276<br>(100)  | 0 (0)        | 0       | 229 (83) | 47 (17)     | 0       | 0          | 0.11 (0.09,<br>0.14) |
|                                          | IRPC  | 96 (26)    | 65.5±6.7             | 7.3 (4.2-10.8) | 41 (43)       | 55 (57)      | 0       | 70 (73)  | 23 (24)     | 3 (3)   | 0          | 0.15 (0.10,<br>0.21) |
| Carlsson<br>(2020 Jun,<br>n=219) [32]    | IRPC  | 219 (100)  | 67 (61-72)           | 5 (4-7)        | 0             | 219<br>(100) | 0       | 151 (69) | 31 (14)     | 5 (2)   | 3 (1)      | NA                   |
| Richard<br>(2020 Jun,<br>n=374) [33]     | IRPC  | 374 (100)  | 67±8                 | 6.9 (5.2-9.5)  |               | 283 (76)     | 91 (24) | NA       | NA          | NA      | NA         | NA                   |
| Butler<br>(2019 Sep,<br>n=15603)<br>[34] | LRPC  | 12380 (79) | NA                   | NA             | NA            | NA           | NA      | NA       | NA          | NA      | NA         | NA                   |
|                                          | FIRPC | 2005 (13)  |                      |                |               |              |         |          |             |         |            |                      |
|                                          | UIRPC | 1218 (8)   |                      |                |               |              |         |          |             |         |            |                      |
| Shelton<br>(2019 Aug,<br>n=548) [35]     | VLRPC | 218 (40)   | NA                   | 5.2 (4.3-6.8)  | 515 (94)      | 29 (5)       | 4 (1)   | 433 (79) | 81 (15)     | 3 (1)   |            | NA                   |
|                                          | LRPC  | 259 (47)   |                      |                |               |              |         |          |             |         |            |                      |
|                                          | IRPC  | 71 (13)    |                      |                |               |              |         |          |             |         |            |                      |
| Thomsen<br>(2019 Mar,<br>n=963) [36]     | VLRPC | 223 (24)   | 66 (63.1-68.1)       | 6.7 (5.2-9.2)  | 841 (90)      | 85 (9)       | 10 (1)  | 798 (83) | 106<br>(11) | 20 (2)  | 12<br>(1)  | 0.15 (0.10-<br>0.21) |
|                                          | LRPC  | 436 (47)   |                      |                |               |              |         |          |             |         |            |                      |
|                                          | IRPC  | 259 (28)   |                      |                |               |              |         |          |             |         |            |                      |
| Masic<br>(2018 Oct,<br>n=1243) [37]      | LRPC  | 1119 (90)  | 62±7.3               | 5.4 (4.2-7.3)  | 1119<br>(90)  | 124 (10)     | 0       | 873 (71) | 361 (29)    |         |            | 0.13 (0.09-<br>0.18) |
|                                          | IRPC  | 124 (10)   |                      |                |               |              |         |          |             |         |            |                      |
| Whalen<br>(2018 Apr,<br>n=237) [38]      | LRPC  | 175 (74)   | 69.8±8.4             | 5.6±3.6        | 155 (65)      | 75 (32)      |         | 205 (86) | 33 (14)     |         |            | NA                   |
|                                          | IRPC  | 62 (26)    |                      |                |               |              |         |          |             |         |            |                      |
| Thostrup<br>(2018 Feb,<br>n=451) [15]    | VLRPC | 152 (34)   | 65.6 (63.0-<br>68.0) | 6.7 (5.2-9.1)  | 412<br>(91.4) | 38 (8.4)     | 1 (0.2) | 408 (91) | 38 (8)      | 4 (0.9) | 1<br>(0.1) | 0.14 (0.09-<br>0.21) |
|                                          | LRPC  | 183 (41)   |                      |                |               |              |         |          |             |         |            |                      |
|                                          | IRPC  | 111 (25)   |                      |                |               |              |         |          |             |         |            |                      |
| Savdie                                   | VLRPC | 245 (37)   | 62.9 (42-82)         | 5 (0.5-9.8)    | 245<br>(100)  | 0            | 0       | 228 (93) | 0           |         |            | 0.11 (0.01<br>0.15)  |

|                                         |        |          |                  |                 |           |          |        |           |          |       |       |                  |
|-----------------------------------------|--------|----------|------------------|-----------------|-----------|----------|--------|-----------|----------|-------|-------|------------------|
| (2017 Oct,<br>n=651) [39]               | LRPC   | 262 (40) | 64.4 (39-79)     | 5.38 (0.33-10)  | 264 (100) | 0        | 0      | 99 (38)   | 156 (59) |       |       | 0.16 (0.01-0.87) |
|                                         | IRPC   | 144 (22) | 67.2 (45-83)     | 8.5 (0.3-46)    | 78 (55)   | 55 (38)  | 10 (7) | 81(54)    | 58 (41)  |       |       | 0.18 (0.04-0.71) |
| Nyame<br>(2017 Sep,<br>n=631) [40]      | LRPC*  | 514 (81) | 65.1 (60.2-69.1) | 4.8 (3.5-6.3)   | 514 (100) | 0        | 0      | NA        | NA       |       |       | 0.11 (0.08-0.16) |
|                                         | IRPC** | 117 (18) | 68.6 (63.7-73.8) | 8 (5-11.8)      | 39 (33)   | 67(57)   | 11(9)  |           |          |       |       | 0.15 (0.11-0.27) |
| Musunuru<br>(2016 Dec,<br>n=945) [41]   | LRPC   | 732 (77) | 67 (60.6-71.9)   | 4.8 (3.2-6.6)   | 732 (100) | 0        | 0      | 614 (84)  | 96 (13)  |       |       | NA               |
|                                         | IRPC   | 213 (23) | 72 (67.3-76.8)   | 10.1 (6.2-11.6) | 85 (39)   | 102 (48) | 20 (9) |           |          |       |       |                  |
| Godtman<br>(2016 Nov,<br>n=474) [14]    | VLRPC  | 244 (51) | 66.0 (63.1-68.1) | NA              | NA        | NA       | NA     | NA        | NA       |       |       | NA               |
|                                         | LRPC   | 126 (27) |                  |                 |           |          |        |           |          |       |       |                  |
|                                         | IRPC   | 104 (22) |                  |                 |           |          |        |           |          |       |       |                  |
| Berg<br>(2016 May,<br>n=235) [42]       | LRPC   | 178 (76) | 66               | 4.1             | 178 (76)  | 29 (12)  | 6 (3)  | NA        | NA       |       |       | NA               |
|                                         | IRPC   | 35 (15)  |                  |                 |           |          |        |           |          |       |       |                  |
| Yamamoto<br>(2016 May,<br>n=980) [43]   | LRPC   | 769 (78) | 70               | 6.2             | 847 (86)  | 133 (14) |        | 783 (80)  | 167 (17) |       |       | NA               |
|                                         | IRPC   | 211 (22) |                  |                 |           |          |        |           |          |       |       |                  |
| Loeb<br>(2015 Feb,<br>n=1729) [44]      | VLRPC  | 644 (37) | 64.0 (60.0-67.0) | 5.6 (4.1-8.0)   | 514 (30)  | 116 (7)  | 0      | 1497 (87) | 232 (13) |       |       | NA               |
|                                         | LRPC   | 757 (44) |                  |                 |           |          |        |           |          |       |       |                  |
|                                         | IRPC   | 328 (19) |                  |                 |           |          |        |           |          |       |       |                  |
| Bul<br>(2012 Dec,<br>n=509) [11]        | LRPC   | 381 (74) | 67.6 (64.2-71.3) | 4.1 (3.2-5.0)   | 381 (100) | 0        | 0      | 325 (85)  | 48 (12)  | 3 (1) | 5 (1) | 0.10 (0.07-0.13) |
|                                         | IRPC   | 128 (26) | 67.4 (64.7-72.1) | 5.3 (4.0-7.6)   | 99 (77)   | 25 (20)  | 4 (3)  | 104 (81)  | 19 (15)  | 5 (4) | 0     | 0.20 (0.12-0.25) |
| Cooperberg<br>(2011 Jan,<br>n=466) [45] | LRPC   | 376 (81) | 62               | 4.99            | 376 (100) | 0        | 0      | 247 (66)  | 129 (34) |       |       | NA               |
|                                         | IRPC   | 90 (19)  | 65               | 10.30           | 61 (68)   | 27 (30)  | 2 (2)  | 56 (62)   | 34 (38)  |       |       |                  |

Summary statistics are as follows: mean  $\pm$  standard deviation, median (interquartile range), or number (%).

\*Also includes some high-risk patients.

\*\* 213 (41%) patients were VLRPC.

\*\*\* 9 (8%) patients were HRPC.

VLRPC – Very low risk prostate cancer, LRPC – Low risk prostate cancer, IRPC – Intermediate risk prostate cancer, FIRPC – Favourable intermediate risk prostate cancer, UIRPC – Unfavourable intermediate risk prostate cancer, LRPC- LV – Low risk prostate cancer – low volume, LRPC- HV – Low risk prostate cancer – high volume.



Table S3. Follow up period and survival data of the different study populations.

| Study name                           | Risk group | Number of patients (percent) | Follow up period in years | Definitive treatment | Treatment free survival | Metastasis free survival | Cancer specific survival | Overall survival       |
|--------------------------------------|------------|------------------------------|---------------------------|----------------------|-------------------------|--------------------------|--------------------------|------------------------|
| Ventimiglia (2022 Sep, n=16177) [24] | VLRPC      | 5522 (34)                    | NA                        | NA                   | NA                      | NA                       | NA                       | NA                     |
|                                      | LRPC       | 9501 (59)                    |                           |                      |                         |                          |                          |                        |
|                                      | IRPC       | 1154 (7)                     |                           |                      |                         |                          |                          |                        |
| Cyll (2022 Apr, n=358) [25]          | LRPC       | 177 (49)                     | 4.2 (2.3-6.0)             | 65 (40)              | 5yrs 69 (61-76)         | NA                       | NA                       | 5yrs 97 (95-98)        |
|                                      | IRPC       | 181 (51)                     |                           | 97 (60)              | 5yrs 44 (36-52)         |                          |                          |                        |
| Courtney (2022 Feb, n=9733) [26]     | LRPC       | 8726 (89)                    | 7.6 (5.7-9.9)             | 3575 (40)            | 10yrs 55.1 (53.9-56.3)  | 10yrs 98.5 (98.1-98.8)   | 10yrs 98.9 (98.6-99.2)   | 10yrs 76.8 (75.6-78)   |
|                                      | FIRPC      | 773 (8)                      | 7.6 (5.8-9.8)             | 607 (78)             | 10yrs 18.4 (15.7-21.7)  | 10yrs 90.4 (87.5-92.9)   | 10yrs 96.3 (94.3-97.7)   | 10yrs 73.8 (69.4-78)   |
|                                      | UIRPC      | 234 (3)                      | 7.8 (6.2-9.5)             | 179 (76)             | 10yrs 21.5 (16.4-27.8)  | 10yrs 80.8 (74.1-86.7)   | 10yrs 88.2 (81.6-93.2)   | 10yrs 59.4 (50.7-68.3) |
| Sayyid (2022 Jan, n=20334) [27]      | FIRPC      | 20334 (100)                  | NA                        | 17 895 (88)          | NA                      | NA                       | NA                       | NA                     |
| Cooley (2021 Nov, n=6775) [28]       | LRPC- LV   | 4604 (68)                    | 6.8                       | 1195 (26)            | 5yrs 78.6 (77.4-79.9)   | NA                       | NA                       | NA                     |
|                                      | LRPC- HV   | 360 (5)                      | 5.9                       | 229 (64)             | 5yrs 35.8 (30.5-41.9)   |                          |                          |                        |
|                                      | IRPC       | 1288 (19)                    | 6.1                       | 493 (38)             | 5yrs 64.1 (61.3-67)     |                          |                          |                        |
| Herden (2021 Jul, n=329) [29]        | VLRPC      | 207 (63)                     | 7.7 (4.7-9.1)             | 108 (52)             | NA                      | NA                       | NA                       | NA                     |
|                                      | LRPC       | 70 (21)                      |                           | 45 (64)              |                         |                          |                          |                        |
|                                      | IRPC*      | 52 (16)                      |                           | 34 (65)              |                         |                          |                          |                        |
| Rakauskas                            | LRPC       | 17 (33)                      | 3                         | 0                    | NA                      | NA                       | NA                       | NA                     |

|                                  |       |            |                |           |                                                 |         |                        |                                                 |
|----------------------------------|-------|------------|----------------|-----------|-------------------------------------------------|---------|------------------------|-------------------------------------------------|
| (2021 Jul, n=51) [30]            | FIRPC | 34 (67)    |                | 17 (50)   |                                                 |         |                        |                                                 |
| Mukherjee (2021 Jan, n=372) [31] | LRPC  | 276 (74)   | 4.9 (2.6-7.8)  | 86 (31.2) | 5yrs 63 (55-69)<br>10yrs 54 (44-62)             | NA      | NA                     | 5yrs 93 (88-96)<br>10yrs 90 (83-94)             |
|                                  | IRPC  | 96 (26)    | 4.1 (2.2-6.1)  | 22 (23)   | 5yrs 69 (56-79)<br>10yrs 69 (56-79)             |         |                        | 5yrs 93 (81-97)<br>10yrs 80 (50-93)             |
| Carlsson (2020 Jun, n=219) [32]  | IRPC  | 219 (100)  | 3.1 (1.9-4.9)  | 64 (29)   | 5yrs 61 (52-70)<br>10yrs 49 (37-60)             | NA      | NA                     | 5yrs 97 (93-99)<br>10yrs 77 (48-92)             |
| Richard (2020 Jun, n=374) [33]   | IRPC  | 374 (100)  | 8.1 (6.0-10.1) | 266 (71)  | 1yr 69.5<br>5yrs 34.9                           | NA      | 5yrs 98<br>8yrs 94     | 5yrs 94<br>8yrs 82                              |
| Butler (2019 Sep, n=15603) [34]  | LRPC  | 12380 (79) | NA             | NA        | NA                                              | NA      | 5yrs 99.9              | 5yrs 96.3                                       |
|                                  | FIRPC | 2005 (13)  |                |           |                                                 |         | 5yrs 99.0              | 5yrs 93.0                                       |
|                                  | UIRPC | 1218 (8)   |                |           |                                                 |         | 5yrs 98.7              | 5yrs 87.2                                       |
| Shelton (2019 Aug, n=548) [35]   | VLRPC | 218 (40)   | 3.4            | 50 (29)   | NA                                              | NA      | NA                     | NA                                              |
|                                  | LRPC  | 259 (47)   |                | 92 (54)   |                                                 |         |                        |                                                 |
|                                  | IRPC  | 71 (13)    |                | 29 (17)   |                                                 |         |                        |                                                 |
| Thomsen (2019 Mar, n=963) [36]   | VLRPC | 223 (24)   | 7.5 (6.1-9.1)  | 320 (34)  | 5yrs 73.4 (67.0-78.7)<br>10yrs 70.8 (64.0-76.5) | NA      | NA                     | 5yrs 95.5 (91.8-97.6)<br>10yrs 88.6 (81.5-93.2) |
|                                  | LRPC  | 436 (47)   |                |           | 5yrs 64.5 (59.8-68.8)<br>10yrs 55.7 (49.9-61.0) |         | 10yrs 99.3 (97.3-99.8) | 5yrs 95.2 (92.7-96.8)<br>10yrs 87.9 (83.5-91.2) |
|                                  | IRPC  | 259 (28)   |                |           | 5yrs 73.5 (67.6-78.5)<br>10yrs 69.0 (61.8-75.0) |         | 10yrs 99.5 (96.6-99.9) | 5yrs 95.8 (92.5-97.6)<br>10yrs 83.9 (75.1-89.7) |
| Masic                            | LRPC  | 1119 (90)  | 5.2            | NA        | 5yrs 64                                         | 5yrs 99 | NA                     | NA                                              |

|                                 |         |          |                |            |                                                 |                                                 |                                        |                                                 |
|---------------------------------|---------|----------|----------------|------------|-------------------------------------------------|-------------------------------------------------|----------------------------------------|-------------------------------------------------|
| (2018 Oct, n=1243) [37]         | IRPC    | 124 (10) |                |            | 5yrs 49                                         | 5yrs 98                                         |                                        |                                                 |
| Whalen (2018 Apr, n=237) [38]   | LRPC    | 175 (74) | 6.0            | 68 (39)    | NA                                              | NA                                              | NA                                     | NA                                              |
|                                 | IRPC    | 62 (26)  |                | 27 (44)    |                                                 |                                                 |                                        |                                                 |
| Thostrup (2018 Feb, n=451) [15] | VLRPC   | 152 (34) | 5.1 (4.6-5.6)  | 142 (32)   | 5yrs 62.1 (51.9-72.3)                           | NA                                              | NA                                     | NA                                              |
|                                 | LRPC    | 183 (41) |                |            | 5yrs 54.0 (45.4-62.6)                           |                                                 |                                        |                                                 |
|                                 | IRPC    | 111 (25) |                |            | 5yrs 70.9 (61.1-80.7)                           |                                                 |                                        |                                                 |
| Savdie (2017 Oct, n=651) [39]   | VLRPC   | 245 (37) | 4.5 (2.8-7.1)  | 79 (32.2)  | 5yrs 66.6<br>10yrs 45.5                         | NA                                              | 5yrs 100<br>10yrs 100                  | 5yrs 98.6 (81-97)<br>10yrs 94.1 (50-93)         |
|                                 | LRPC    | 262 (40) | 4.5 (2.4-7)    | 115 (43.8) | 5yrs 55.5<br>10yrs 38.8                         |                                                 |                                        |                                                 |
|                                 | IRPC    | 144 (22) | 4.4 (2.6-6.7)  | 65 (41)    | 5yrs 50.0<br>10yrs 34.1                         |                                                 |                                        |                                                 |
| Nyame (2017 Sep, n=631) [40]    | LRPC**  | 514 (81) | 4.2 (2.5-6.7)  | 182 (35)   | 5yrs 62.0 (57-66.6)<br>10yrs 48.7 (41.1-55.8)   | 5yrs 99.2 (96.6-99.8)<br>10yrs 97.4 (89.6-99.4) | 100%                                   | 5yrs 98.4 (96.2-99.3)<br>10yrs 96.5 (92.9-98.3) |
|                                 | IRPC*** | 117 (18) | 3.6 (2.6-6)    | 40 (34)    | 5yrs 58.8 (46.4-68.7)<br>10yrs 52.3 (38.9-64.1) | 5yrs 99.0 (93.2-99.9)<br>10yrs 99.0 (93.2-99.9) | 100%                                   | 5yrs 95.6 (86.9-98.6)<br>10yrs 77 (34.4-93.8)   |
| Musunuru (2016 Dec, n=945) [41] | LRPC    | 732 (77) | 6.5 (3.8-9.1)  | 547 (74)   | 10yrs 64 (60-69)<br>15yrs 58 (52-65)            | 10yrs 96 (94-98)<br>15yrs 95 (91-98)            | 10yrs 98 (97-100)<br>15yrs 97 (93-100) | 10yrs 84 (80-88)<br>15yrs 67 (59-75)            |
|                                 | IRPC    | 213 (23) | 6.7 (3.9-10.4) | 139 (65)   | 10yrs 61 (54-69)<br>15yrs 48 (38-61)            | 10yrs 91 (85-97)<br>15yrs 82 (73-92)            | 10yrs 97 (94-100)<br>15yrs 89 (80-98)  | 10yrs 67 (60-76)<br>15yrs 51 (41-63)            |
| Godtman (2016 Nov, n=474) [14]  | VLRPC   | 244 (51) | 6.3            | 202 (43)   | 10yrs 53 (44-61)<br>15yrs 48 (39-57)            | 10yrs 99 (96-100)<br>15yrs 93 (84-97)           | 10yrs 100<br>15yrs 100                 | 10yrs 80 (76-84)<br>15yrs 51 (42-59)            |
|                                 | LRPC    | 126 (27) |                |            | 10yrs 42 (31-52)<br>15yrs 27 (13-43)            |                                                 | 10yrs 100<br>15yrs 94 (77-98)          |                                                 |

|                                         |       |          |               |          |                                                    |                                  |                                       |            |
|-----------------------------------------|-------|----------|---------------|----------|----------------------------------------------------|----------------------------------|---------------------------------------|------------|
|                                         | IRPC  | 104 (22) |               |          | 10yrs 41 (28-53)<br>15yrs 13 (1-37)                |                                  | 10yrs 98 (85-100)<br>15yrs 90 (72-97) |            |
| Berg<br>(2016 May,<br>n=235) [42]       | LRPC  | 178 (76) | 3.5           | 18 (10)  | 2yrs 94<br>5yrs 82<br>10yrs 67                     | NA                               | NA                                    | NA         |
|                                         | IRPC  | 35 (15)  |               | 7 (20)   |                                                    |                                  |                                       |            |
| Yamamoto<br>(2016 May,<br>n=980) [43]   | LRPC  | 769 (78) | 6.4           | NA       | NA                                                 | 5yrs 100<br>10yrs 95<br>15yrs 92 | NA                                    | NA         |
|                                         | IRPC  | 211 (22) |               |          |                                                    | 5yrs 96<br>10yrs 90<br>15yrs 84  |                                       |            |
| Loeb<br>(2015 Feb,<br>n=1729) [44]      | VLRPC | 644 (37) | 5             | 614 (36) | 1yr 97<br>2yrs 85<br>3yrs 77<br>4yrs 70<br>5yrs 65 | NA                               | NA                                    | NA         |
|                                         | LRPC  | 757 (44) |               |          | 1yr 96<br>2yrs 87<br>3yrs 79<br>4yrs 73<br>5yrs 67 |                                  |                                       |            |
|                                         | IRPC  | 328 (19) |               |          | 1yr 94<br>2yrs 82<br>3yrs 71<br>4yrs 63<br>5yrs 59 |                                  |                                       |            |
| Bul<br>(2012 Dec,<br>n=509) [11]        | LRPC  | 381 (74) | 7.5 (4.9-9.6) | 152 (39) | 10yrs 49.7                                         | 10yrs 99.7                       | 10yrs 99.1                            | 10yrs 79   |
|                                         | IRPC  | 128 (26) | 7.2 (5.3-9.9) | 69 (54)  | 10yrs 30.3                                         | 10yrs 96.4                       | 10yrs 96.1                            | 10yrs 64.5 |
| Cooperberg<br>(2011 Jan,<br>n=466) [45] | LRPC  | 376 (81) | 3.9           | 113 (30) | NA                                                 | NA                               | NA                                    | NA         |
|                                         | IRPC  | 90 (19)  | 4.3           | 31 (35)  |                                                    |                                  |                                       |            |

Summary statistics are as follows: number (%), median (interquartile range), or % (95% confidence interval).

\*Also includes some high-risk patients.

\*\* 213 (41%) patients were VLRPC.

\*\*\* 9 (8%) patients were high-risk.

VLRPC – Very low risk prostate cancer, LRPC – Low risk prostate cancer, IRPC – Intermediate risk prostate cancer, FIRPC – Favourable intermediate risk prostate cancer, UIRPC – Unfavourable intermediate risk prostate cancer, LRPC- LV – Low risk prostate cancer – low volume, LRPC- HV – Low risk prostate cancer – high volume.
